# Supplementary material for: Protease‐resistant streptavidin for interaction proteomics
Source: PubMed Central journal article supplement (PMC7218406; doi:10.15252/msb.20199370), 2020-05-13
Supplement: MSB-16-e9370-s001.pdf [file MSB-16-e9370-s001.pdf]

## Expanded View Figures

A

>sp|P22629|SAV\_STRAV Streptavidin OS=Streptomyces avidinii OX=1895 PE=1 SV=1

MRKIVVAAIAVSLTTVSITASASADPSKDSKAQVSAEAGITGTWYNQLGSTFIVTAGAD  
 GALTGTYESAVGNAESRYVLTGRYDSAPATDGSALTGWTVAWKNNYRNAHSATTWSGQY  
 VGGAEARINTQWLLTSGTTEANAWKSTLVGHDTFTKVKPSAASIDAACKAGVNNGNPLDA  
 VQQ

B

STLVGHDTFTK  $m/z = 603.3$

NAHSATTWSGQYVGGAEAR  $m/z = 655.3$

INTQWLLTSGTTEANAWK  $m/z = 1018.0$

C

|                  |           | Intensity    |              |                  |       |
|------------------|-----------|--------------|--------------|------------------|-------|
|                  |           | Streptavidin | All proteins | Streptavidin (%) |       |
| BioID Low amount | Ctr_wtS   | R1           | 4.0E+09      | 6.3E+09          | 64.09 |
|                  |           | R2           | 4.0E+08      | 6.2E+08          | 63.67 |
|                  |           | R3           | 4.85+09      | 7.9E+09          | 61.49 |
|                  | Ctr_prS   | R1           | 6.5E+08      | 4.5E+10          | 1.46  |
|                  |           | R2           | 7.5E+08      | 4.5E+10          | 1.67  |
|                  |           | R3           | 1.0E+09      | 5.9E+10          | 1.73  |
|                  | BioID_wtS | R1           | 3.4E+09      | 5.4E+09          | 63.85 |
|                  |           | R2           | 3.3E+09      | 5.0E+09          | 67.00 |
|                  |           | R3           | 4.4E+09      | 6.8E+09          | 64.72 |
|                  | BioID_prS | R1           | 6.0E+08      | 5.7E+10          | 1.06  |
|                  |           | R2           | 7.1E+08      | 5.6E+10          | 1.27  |
|                  |           | R3           | 6.7E+08      | 6.1E+10          | 1.11  |

  

|            |                   | Intensity    |         |              |         |                  |       |       |
|------------|-------------------|--------------|---------|--------------|---------|------------------|-------|-------|
|            |                   | Streptavidin |         | All proteins |         | Streptavidin (%) |       |       |
|            |                   | R1           | R2      | R1           | R2      | R1               | R2    |       |
| ChIP-SiCAP | wtS_HpH fractions | fr1          | 3.2E+07 | 2.5E+07      | 2.6E+08 | 2.9E+08          | 12.51 | 8.78  |
|            |                   | fr2          | 5.8E+06 | 1.6E+07      | 9.0E+07 | 1.1E+08          | 6.44  | 14.14 |
|            |                   | fr3          | 8.9E+05 | 8.5E+05      | 2.0E+08 | 2.3E+08          | 0.45  | 0.36  |
|            |                   | fr4          | 2.1E+08 | 2.3E+08      | 5.0E+08 | 5.7E+08          | 42.87 | 40.53 |
|            |                   | fr5          | 8.2E+07 | 8.9E+08      | 1.2E+08 | 1.2E+09          | 68.70 | 76.30 |
|            |                   | fr6          | 1.5E+08 | 2.6E+08      | 7.5E+08 | 1.1E+09          | 19.97 | 24.40 |
|            |                   | fr7          | 5.6E+07 | 6.0E+07      | 4.5E+08 | 4.6E+08          | 12.35 | 12.93 |
|            |                   | fr8          | 3.9E+07 | 6.3E+07      | 1.6E+08 | 2.0E+08          | 24.56 | 30.83 |
|            |                   | fr9          | 1.8E+07 | 2.4E+07      | 2.2E+08 | 3.8E+08          | 8.11  | 6.24  |
|            |                   | fr10         | 1.2E+07 | 2.4E+07      | 4.5E+08 | 6.0E+08          | 2.60  | 4.01  |
|            | Single injection  | wtS          | 4.1E+09 | 3.3E+09      | 8.2E+09 | 6.3E+09          | 50.24 | 51.84 |
|            | prS               | 2.6E+06      | 0       | 1.7E+10      | 2.2E+10 | 0.01             | 0.00  |       |

  

|                   |           | Intensity    |              |                  |       |
|-------------------|-----------|--------------|--------------|------------------|-------|
|                   |           | Streptavidin | All proteins | Streptavidin (%) |       |
| BioID High amount | Ctr_wtS   | R1           | 1.2E+11      | 2.1E+11          | 60.34 |
|                   |           | R2           | 1.3E+11      | 2.0E+11          | 62.34 |
|                   |           | R3           | 7.3E+10      | 1.5E+11          | 49.36 |
|                   | Ctr_prS   | R1           | 1.0E+10      | 4.6E+11          | 2.25  |
|                   |           | R2           | 7.7E+09      | 4.1E+11          | 1.87  |
|                   |           | R3           | 9.2E+09      | 5.0E+11          | 1.85  |
|                   | BioID_wtS | R1           | 1.5E+11      | 1.9E+11          | 77.39 |
|                   |           | R2           | 1.4E+11      | 1.9E+11          | 72.01 |
|                   |           | R3           | 1.2E+11      | 1.8E+11          | 66.96 |
|                   | BioID_prS | R1           | 8.2E+09      | 5.1E+11          | 1.60  |
|                   |           | R2           | 7.4E+09      | 5.0E+11          | 1.48  |
|                   |           | R3           | 6.1E+09      | 4.6E+11          | 1.33  |

  

|        |    | Intensity    |              |                  |
|--------|----|--------------|--------------|------------------|
|        |    | Streptavidin | All proteins | Streptavidin (%) |
| Lipids | R1 | 1.9E+11      | 1.7E+12      | 9.76             |
|        | R2 | 1.4E+11      | 1.1E+12      | 11.44            |
|        | R3 | 1.4E+11      | 1.7E+12      | 7.19             |

  

|                   |        | Intensity    |              |                  |
|-------------------|--------|--------------|--------------|------------------|
|                   |        | Streptavidin | All proteins | Streptavidin (%) |
| Membrane proteins | wtS_10 | 1.1E+11      | 1.6E+11      | 70.58            |
|                   | prS_10 | 9.4E+06      | 1.4E+10      | 0.07             |
|                   | prS_90 | 1.6E+08      | 9.6E+10      | 0.18             |

Figure EV1. Tryptic digestion of streptavidin.

- A Amino acid sequence of streptavidin protein. Residues cleaved by trypsin are shown in red.  
 B Sequence and  $m/z$  of the top-3 streptavidin peptides, used to determine the extracted ion chromatogram (XIC) shown in main Fig 1E and F.  
 C Summary of the total iBAQ (All proteins) and streptavidin iBAQ values in all the experiments shown in main Figs 2 and 3.

**Figure EV2. Suz12 chromatin interactors identified via prS bead ChIP-SICAP experiment and single injection or wtS bead enrichment followed by HpH fractionation.**

- A Experimental procedure.
- B Intensity of all PRC2 complex components and streptavidin in ChIP-SICAP with wtS beads and subjected to HpH fractionation or prS bead and single injection. The error bars show standard deviation of two replicates
- C Digesting mock beads prepared according to Barshop *et al* (blue) and prS (red) protocols. Intensity of streptavidin peptides (left) and XICs of the top-two streptavidin peptides (right).
- D Comparing beads prepared according to Barshop *et al* with prS beads using a Suz12 ChIP-SICAP assay. Intensity of streptavidin (left). Number of identified proteins (right).
- E Comparative Suz12 ChIP-SICAP between 2i and serum. Full MS spectra between 612–618 *m/z* at retention time: 64–65 min are shown. Specific precursors (*m/z*: 617.2866 and 612.2821) from Aebp2 isoform 3/4 are detected in the forward experiment (top) and the reverse experiment (bottom).
- F MS/MS spectra indicating the N-terminal peptide of Aebp2 isoform 3/4 : mDIDSTISSGR.
- G Western blot of whole-cell lysate of mES cells grown in 2i and serum media. Top: anti-Aebp2; bottom: anti-GAPDH. Arrows A and B show two bands detected by Aebp2 antibody. The intensities of band A and B were compared between 2i and serum normalized to GAPDH as the loading control.

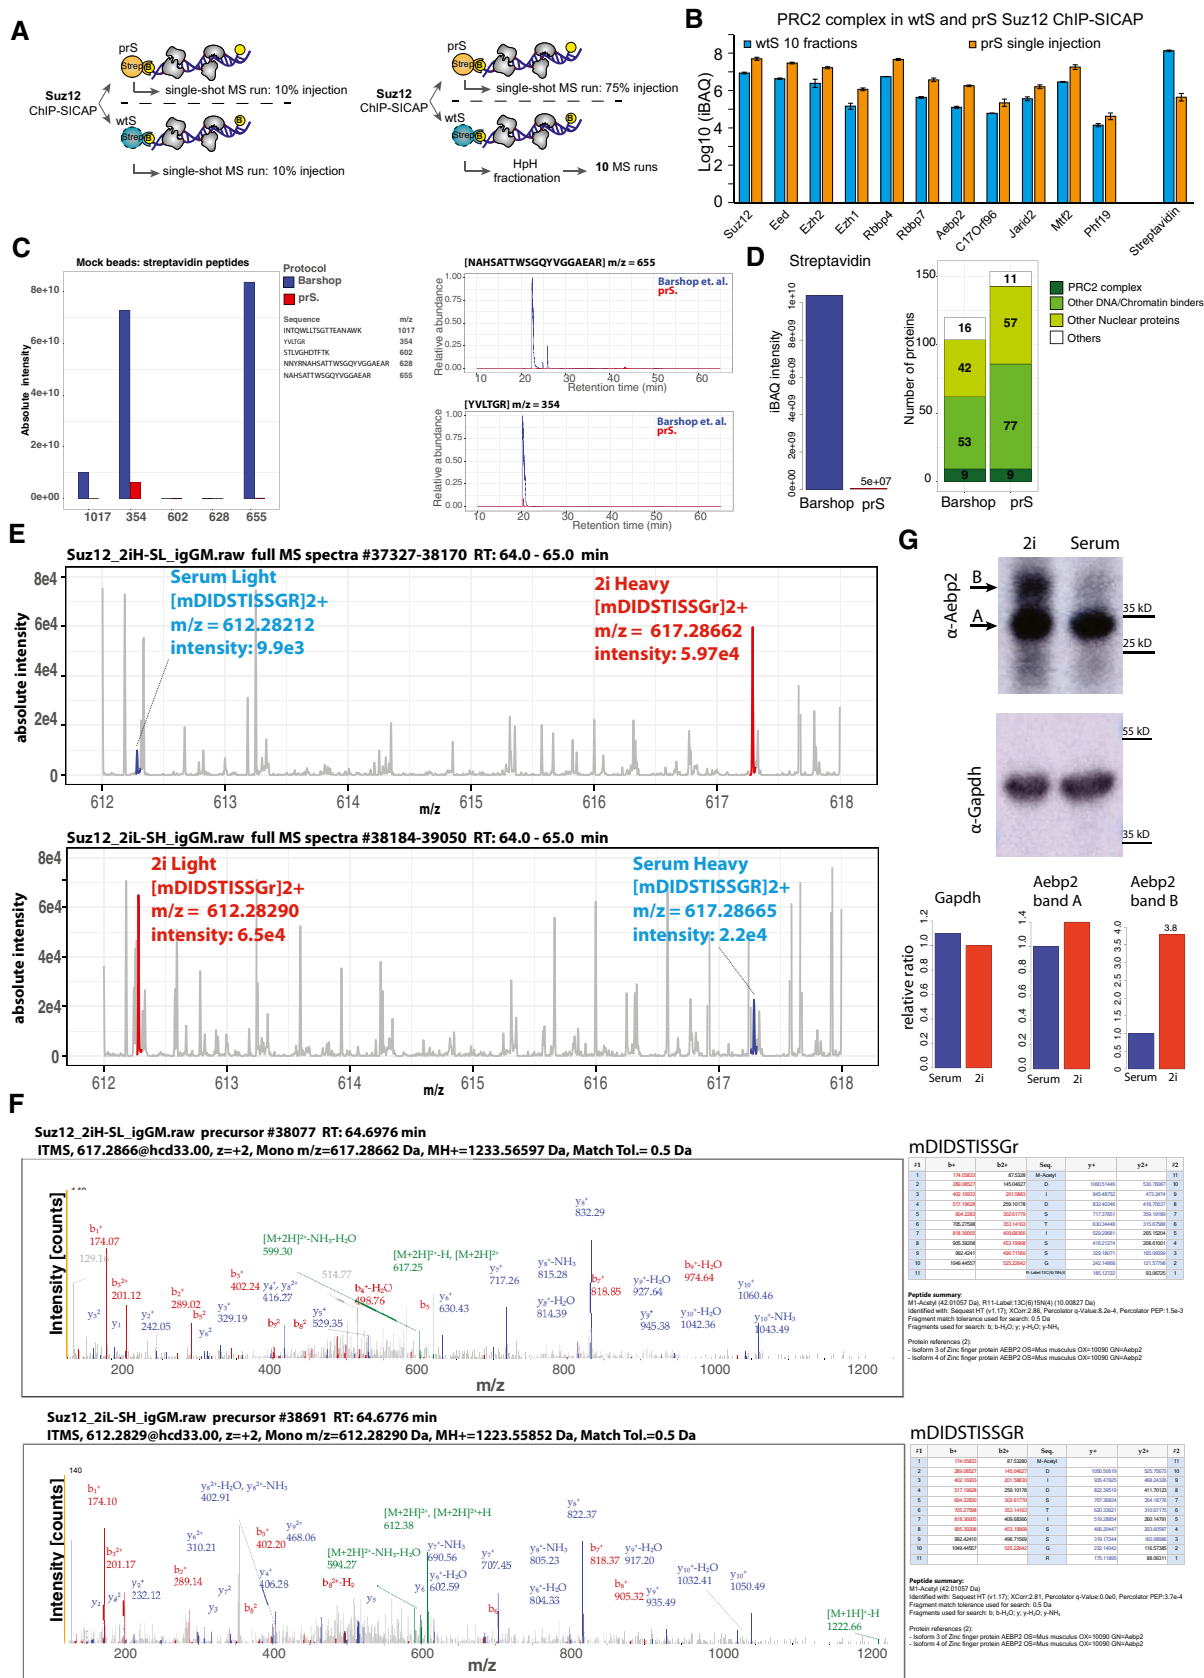

Figure EV2.

**Figure EV3. Comparing performance of prS and wtS beads in biotin-based enrichment experiments. BioID.**

- A Experimental procedure.
- B, C Ranking of proteins identified in BioID experiments performed with either prS or wtS beads in target (SEC61B) or control cells and injection of 100 ng (low amount) (B) or 1  $\mu$ g (high amount) (C).
- D The boxplots indicate the number of MS events, the percentage of MS/MS identified, and the peptide-spectrum matches (PSMs) in the different experiments. In the boxplots, the boxes show interquartile ranges (IQR = Q3-Q1). The whiskers extend to data points that are  $< 1.5 \times$  IQR away from Q1 or Q3 (Turkey whiskers), and the central lines show the medians. *T*-test *P*-values were calculated where \**P* < 0.05, \*\* = 0.001, \*\*\* < 0.001.
- E, F Integral membrane proteins. (E) Experimental procedure. (F) Intensity and iBAQ values of streptavidin peptides after injecting 10% of the wtS sample, 10% of the prS sample or 90% of the prS sample.
- G, H Lipid-interacting proteins. (G) Experimental procedure. (H) Histograms of proteins that were enrichment over control upon biotinylated sphingolipid pull-down with prS beads and on-bead digestion.

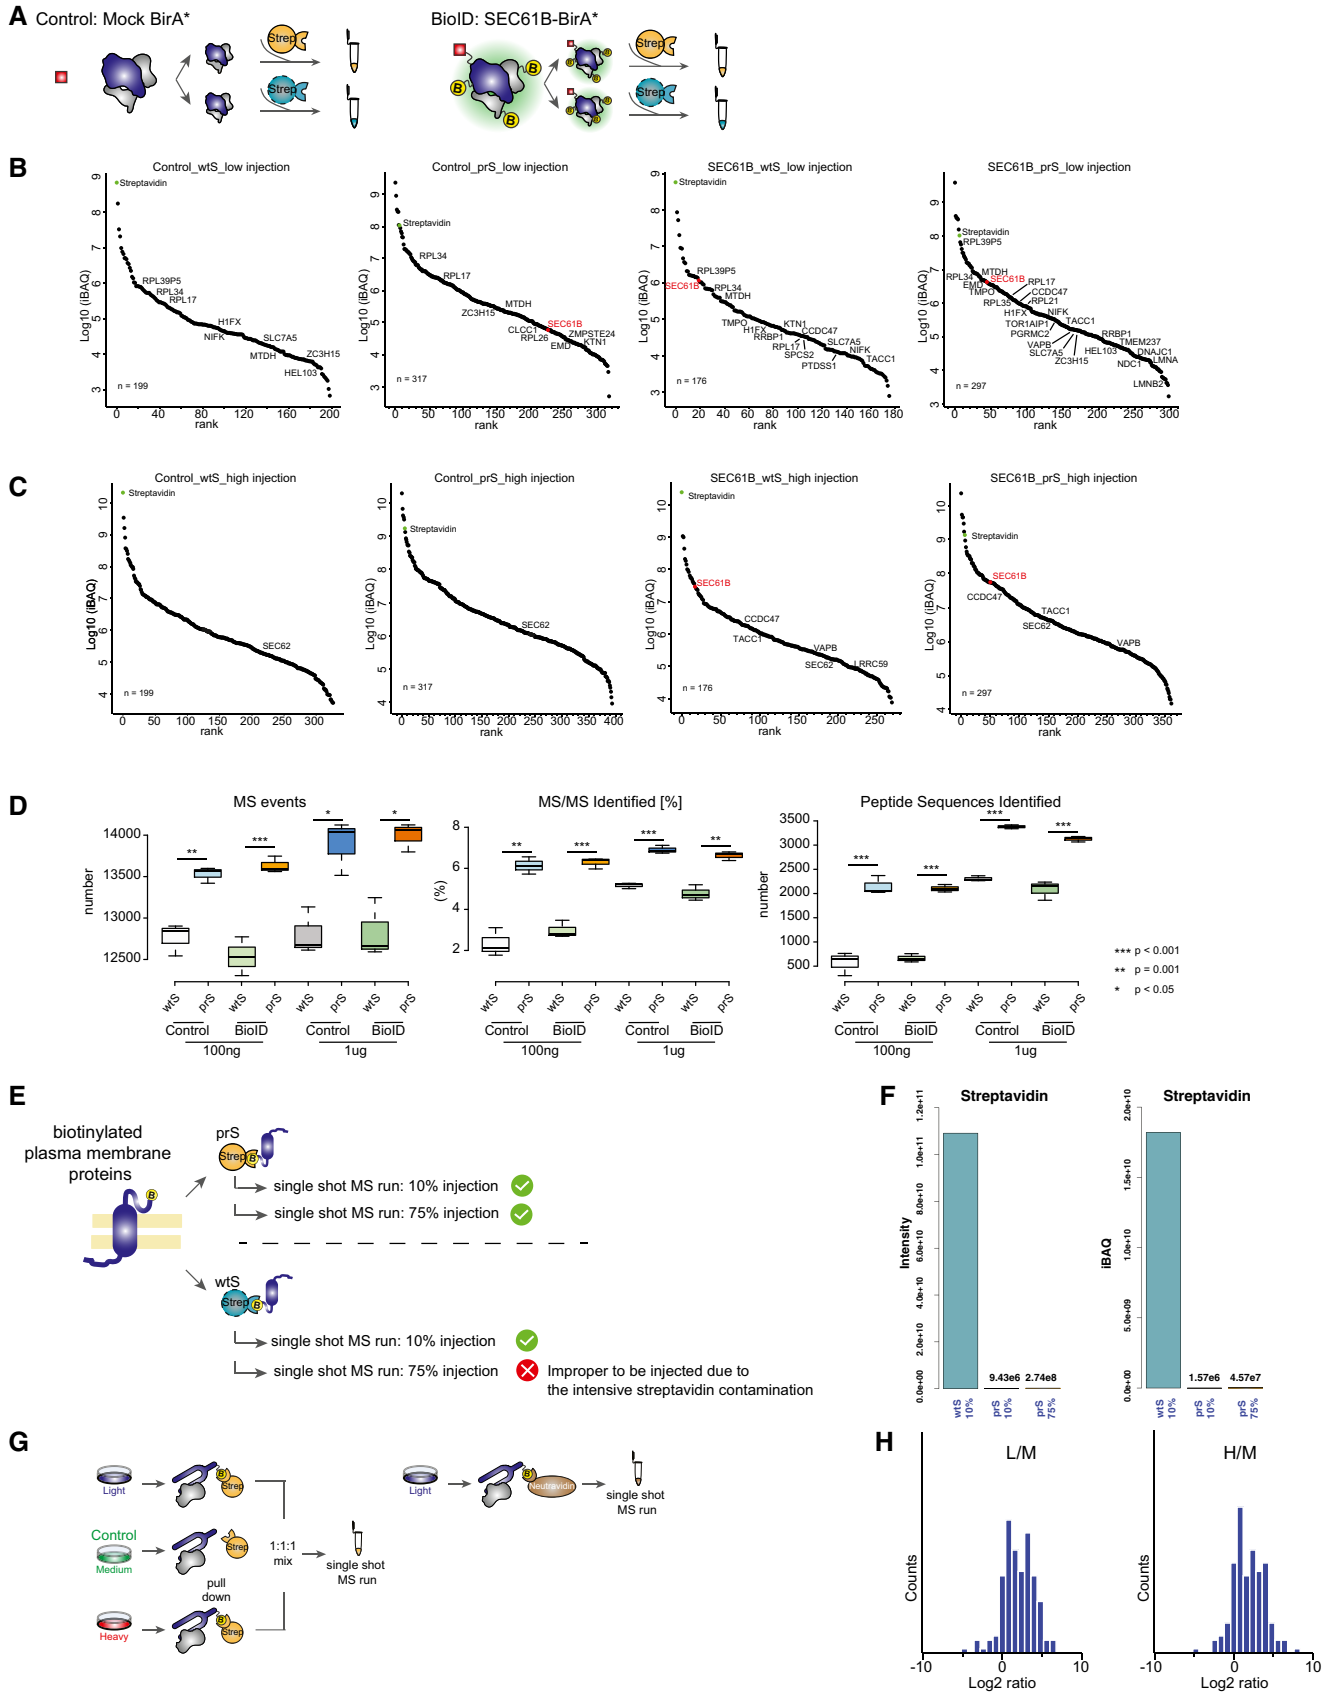

Figure EV3.
